# Supplementary material for: Gas phase fragmentation of protonated betaine and its clusters
Source: Royal Society of Chemistry journal article supplement (doi:10.1039/b909653a), 2009-01-01
Supplement: b909653a.pdf [file b909653a.pdf]

# Electronic Supplementary Information

## Gas phase fragmentation of protonated betaine and its clusters

Jean A. Wyer,<sup>a</sup> Linda Feketeová,<sup>b-d</sup> Steen Brøndsted Nielsen<sup>a\*</sup> and Richard A. J. O'Hair<sup>b-d\*</sup>

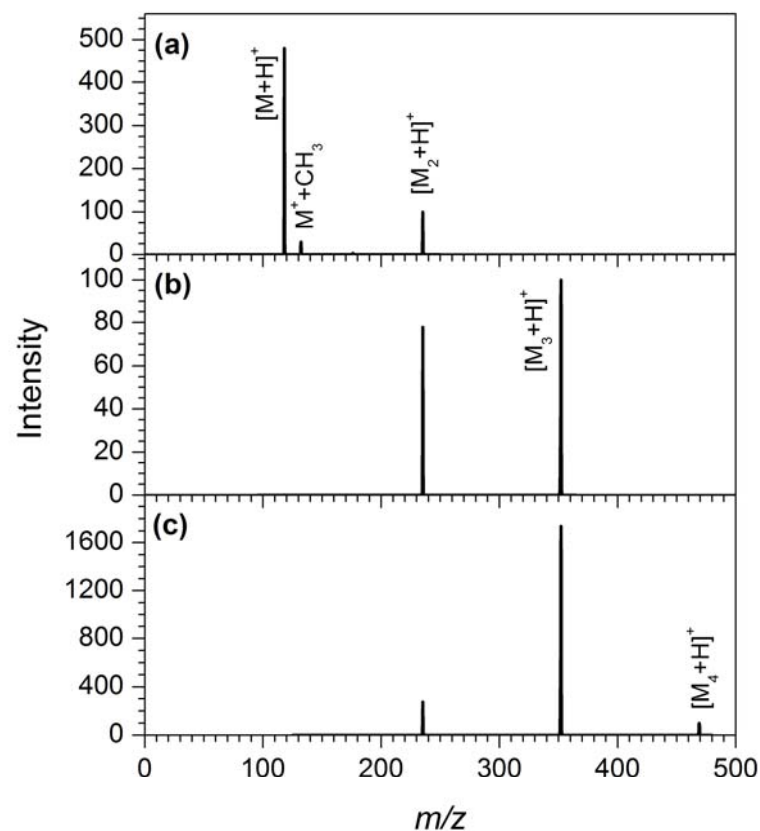

**Fig. S1:** CID spectra resulting from low energy collisions of  $[M_n + H]^+$  with He, where M is  $(CH_3)_3N^+CH_2COO^-$  and  $n$  is (a) 2, (b) 3, and (c) 4. The intensities of the parent peaks are set to 100.

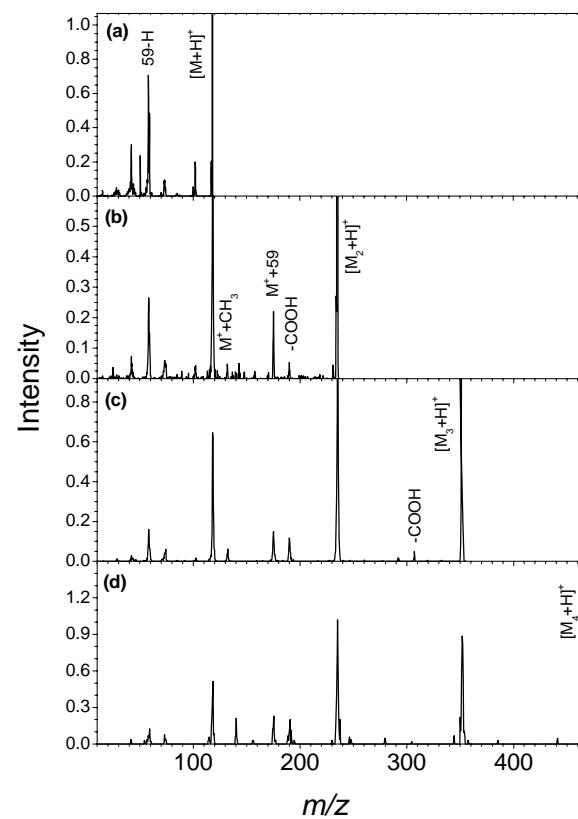

**Fig. S2:** CID spectra resulting from high energy collisions of  $[M_n + H]^+$  with  $O_2$ , where M is  $(CH_3)_3N^+CH_2COO^-$  and  $n$  is (a) 1, (b) 2, (c) 3 and (d) 4. The intensities of the parent peaks are set to 100. In (b) and (c) the intensities of the peaks corresponding to evaporation of one neutral betaine molecule are 2.05 and 1.83, respectively. See main text for assignment of peak at  $m/z$  59.

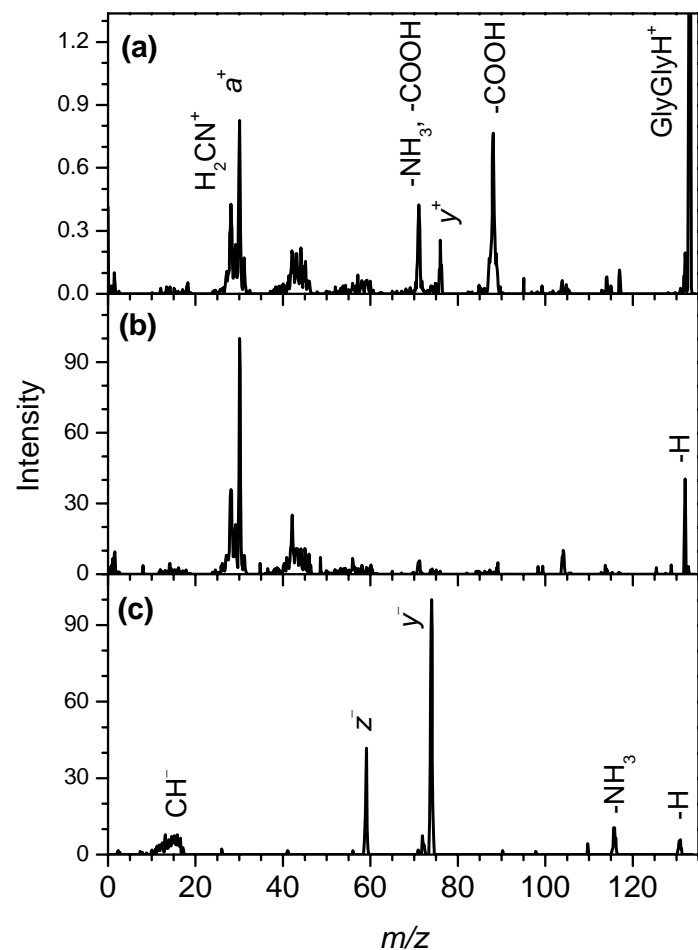

**Fig. S3:** Spectra resulting from high energy collisions of GlyGlyH<sup>+</sup> with Cs and O<sub>2</sub>. The graphs show spectra from experiments investigating (a) CID (O<sub>2</sub>), (b) neutral reionisation and (c) charge reversal. The largest peaks in the spectra are set to 100.

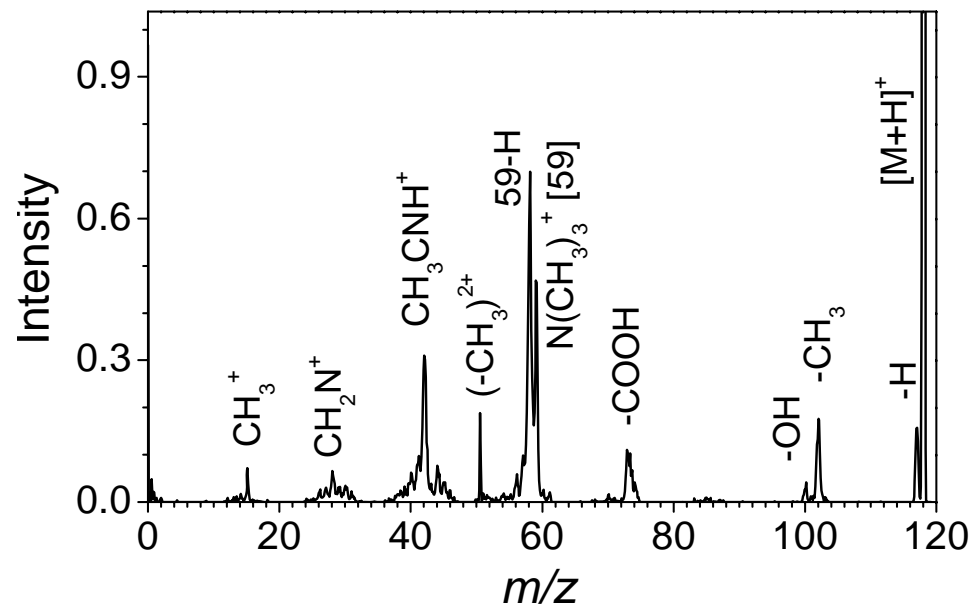

**Fig. S4:** CID spectrum resulting from high energy collisions of (CH<sub>3</sub>)<sub>3</sub>NCH<sub>2</sub>COOH<sup>+</sup> with Cs and O<sub>2</sub>. The intensity of the parent peak is set to 100.

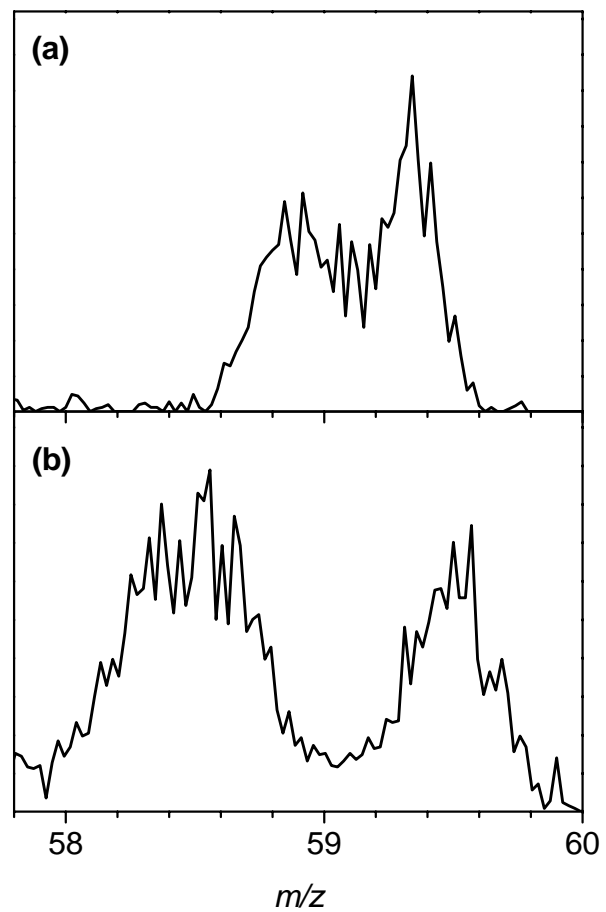

**Fig. S5:** Charge reversal spectra resulting from high energy collisions of  $^+(\text{CH}_3)_3\text{NCH}_2\text{COOH}$  with Cs. The energy of the projectile beam is (a) 50 keV and (b) 25 keV.

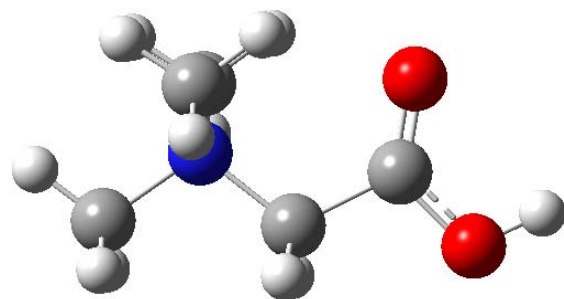

[M+H]<sup>+</sup>

|   |             |             |             |
|---|-------------|-------------|-------------|
| C | 1.53931600  | 0.00701200  | -0.00017800 |
| C | 0.26625700  | -0.83481700 | -0.00119900 |
| O | 1.59099600  | 1.20649100  | 0.00017800  |
| O | 2.58543700  | -0.81714800 | -0.00009300 |
| N | -1.02630100 | -0.05489200 | -0.00006600 |
| H | 0.27084700  | -1.47718900 | -0.88230600 |
| H | 0.27083400  | -1.47909700 | 0.87851300  |
| H | 3.40748100  | -0.29593200 | 0.00011900  |
| C | -1.14510100 | 0.80428400  | 1.23874500  |
| C | -2.15562600 | -1.05588900 | -0.00194100 |
| C | -1.14489600 | 0.80901800  | -1.23561400 |
| H | -0.35430700 | 1.54652800  | 1.22752200  |
| H | -1.06103600 | 0.16360300  | 2.11441900  |
| H | -2.12102500 | 1.28369800  | 1.22324600  |
| H | -3.09734000 | -0.51226400 | -0.00083000 |
| H | -2.08345700 | -1.67604600 | 0.88896400  |
| H | -2.08355400 | -1.67254000 | -0.89527600 |
| H | -2.12060500 | 1.28880300  | -1.21816100 |
| H | -1.06126500 | 0.17157700  | -2.11369100 |
| H | -0.35363500 | 1.55071700  | -1.22162100 |

Filename: betH+  
Sum of electronic and  
zero-point energies = -402.67793 Hartrees

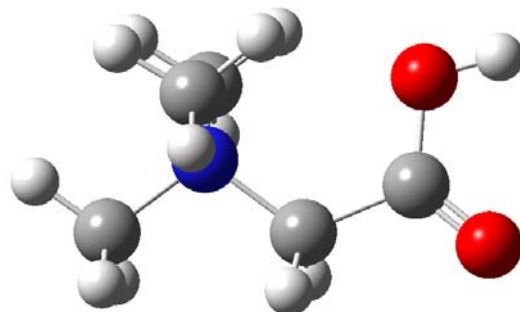

[M+H]<sup>+</sup> isomer

|   |             |             |             |
|---|-------------|-------------|-------------|
| C | 1.62084200  | -0.19982100 | -0.03748500 |
| C | 0.24508800  | -0.85104500 | -0.18492100 |
| O | 1.62666200  | 1.14453500  | -0.01067700 |
| O | 2.59034400  | -0.89287600 | 0.01728500  |
| N | -1.02277800 | -0.03783500 | 0.00277200  |
| H | 0.20457200  | -1.28520000 | -1.18481000 |
| H | 0.21486700  | -1.66936200 | 0.53278300  |
| C | -1.05447300 | 0.61568300  | 1.36314800  |
| C | -2.18255400 | -1.00149200 | -0.09320700 |
| C | -1.18058600 | 1.00525400  | -1.07790000 |
| H | -0.25532800 | 1.34671500  | 1.42499800  |
| H | -0.92831600 | -0.15364200 | 2.12243300  |
| H | -2.01995900 | 1.10117000  | 1.48535400  |
| H | -3.10731600 | -0.44052600 | 0.01895600  |
| H | -2.09667900 | -1.74062800 | 0.70009900  |
| H | -2.15897200 | -1.48957000 | -1.06506900 |
| H | -2.13174600 | 1.51000200  | -0.92499900 |
| H | -1.17777000 | 0.50606400  | -2.04474100 |
| H | -0.36149300 | 1.71261500  | -1.01342400 |
| H | 2.55164600  | 1.44245700  | 0.05833900  |

Filename: Bet\_TS-6ringB\_high\_OPT\_REV  
Sum of electronic and  
zero-point energies = -402.67148 Hartrees

**Figure S6:** B3LYP/6-311++G(2d,p) calculated Cartesian coordinates and energies (Hartrees) for species relevant to the [M+H]<sup>+</sup>.

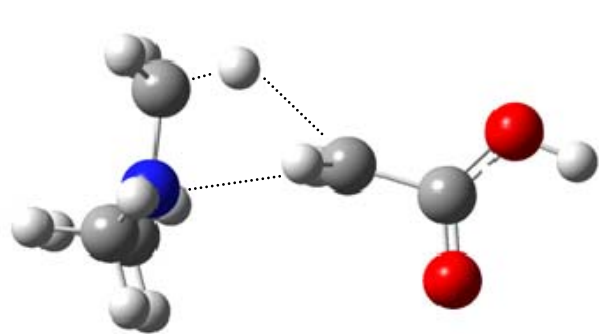

TS1

|   |             |             |             |
|---|-------------|-------------|-------------|
| N | -1.86393000 | 0.03353400  | 0.00000900  |
| C | -1.69095400 | 1.43965900  | -0.00017300 |
| H | -0.58422900 | 1.71685700  | -0.00034800 |
| H | -2.09403100 | 1.90957700  | -0.89776400 |
| H | -2.09381900 | 1.90977700  | 0.89740600  |
| C | -2.29746000 | -0.61303400 | 1.23577100  |
| H | -2.04346400 | -1.67187900 | 1.20896600  |
| H | -1.81652900 | -0.14789600 | 2.09578000  |
| H | -3.38425000 | -0.51855300 | 1.35697000  |
| C | -2.29741500 | -0.61332400 | -1.23561600 |
| H | -1.81636600 | -0.14846500 | -2.09571200 |
| H | -2.04352500 | -1.67218700 | -1.20850900 |
| H | -3.38418500 | -0.51876800 | -1.35693700 |
| C | 2.32909600  | -0.12259700 | -0.00000300 |
| O | 2.39306400  | -1.32905300 | 0.00004800  |
| O | 3.29581000  | 0.75907100  | 0.00001000  |
| H | 4.16722200  | 0.31922100  | 0.00006000  |
| C | 0.92833600  | 0.32453700  | -0.00004700 |
| H | 0.40008400  | 0.32824600  | 0.93803000  |
| H | 0.39998800  | 0.32774100  | -0.93806800 |

Filename: Bet\_TS-4ring\_A7\_1\_high  
 Sum of electronic and  
 zero-point energies = -402.55982 Hartrees

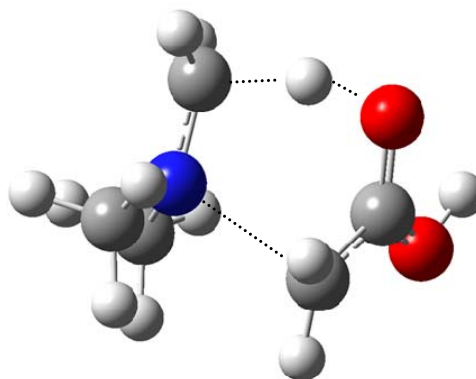

TS2

|   |             |             |             |
|---|-------------|-------------|-------------|
| C | 1.51879300  | 0.03097900  | 0.34539700  |
| C | 0.55672800  | -0.46272200 | 1.22552300  |
| O | 1.49023500  | 1.26489200  | 0.00453800  |
| O | 2.32272900  | -0.81801100 | -0.28537500 |
| N | -1.15858900 | 0.02027000  | -0.16586400 |
| H | 0.49791700  | -1.52465800 | 1.42182400  |
| H | 0.16572800  | 0.22150100  | 1.96084200  |
| H | 2.90908700  | -0.33402300 | -0.89059700 |
| C | -0.90170200 | 1.19435700  | -0.81301800 |
| C | -2.21134500 | 0.04689700  | 0.88121700  |
| C | -1.17368500 | -1.21116000 | -0.99546900 |
| H | 0.41913600  | 1.48179400  | -0.41053900 |
| H | -1.40900600 | 2.07296300  | -0.42885800 |
| H | -0.73653000 | 1.12666900  | -1.88297200 |
| H | -3.18291800 | 0.07902300  | 0.38340100  |
| H | -2.09256500 | 0.93503000  | 1.49699900  |
| H | -2.14421700 | -0.84706600 | 1.49529000  |
| H | -2.07484300 | -1.19832500 | -1.61213700 |
| H | -1.18319200 | -2.08600800 | -0.35176100 |
| H | -0.29492300 | -1.23394600 | -1.63565700 |

Filename: Bet\_TS-59\_form\_6C\_high  
 Sum of electronic and  
 zero-point energies = -402.58549 Hartrees

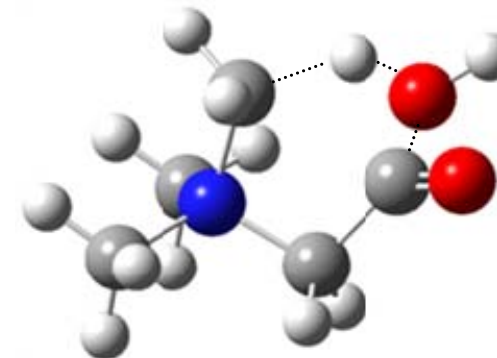

TS3

|   |             |             |             |
|---|-------------|-------------|-------------|
| C | 1.34847600  | -0.40262300 | -0.15951600 |
| C | 0.05235900  | -0.56721100 | -0.91912400 |
| O | 1.67431600  | 1.28247300  | -0.03744000 |
| O | 2.26207600  | -1.10194200 | 0.01240500  |
| N | -1.00455500 | -0.03390600 | 0.01305600  |
| H | 0.06535900  | -0.04621600 | -1.87635500 |
| H | -0.08967100 | -1.63407900 | -1.08449400 |
| C | -0.21443400 | 0.10802300  | 1.32087600  |
| C | -2.16924400 | -0.98229800 | 0.12086800  |
| C | -1.50942100 | 1.30494800  | -0.45122900 |
| H | 1.05588900  | 1.11772900  | 0.82143500  |
| H | -0.20478500 | -0.86418900 | 1.80952000  |
| H | -0.72375800 | 0.82230700  | 1.97085200  |
| H | -2.86865400 | -0.57381400 | 0.84640000  |
| H | -1.80437500 | -1.94704800 | 0.46551000  |
| H | -2.65343500 | -1.08427600 | -0.84996400 |
| H | -2.21820800 | 1.67510700  | 0.28559800  |
| H | -2.00225400 | 1.18282000  | -1.41421700 |
| H | -0.67453800 | 1.99415800  | -0.54250300 |
| H | 2.61276400  | 1.38556600  | 0.20585200  |

Filename: Bet\_TS-6ringB\_high  
 Sum of electronic and  
 zero-point energies = -402.54746 Hartrees

**Figure S7:** B3LYP/6-311++G(2d,p) calculated Cartesian coordinates and energies (Hartrees) for transition states relevant to the  $[M+H]^+$ .

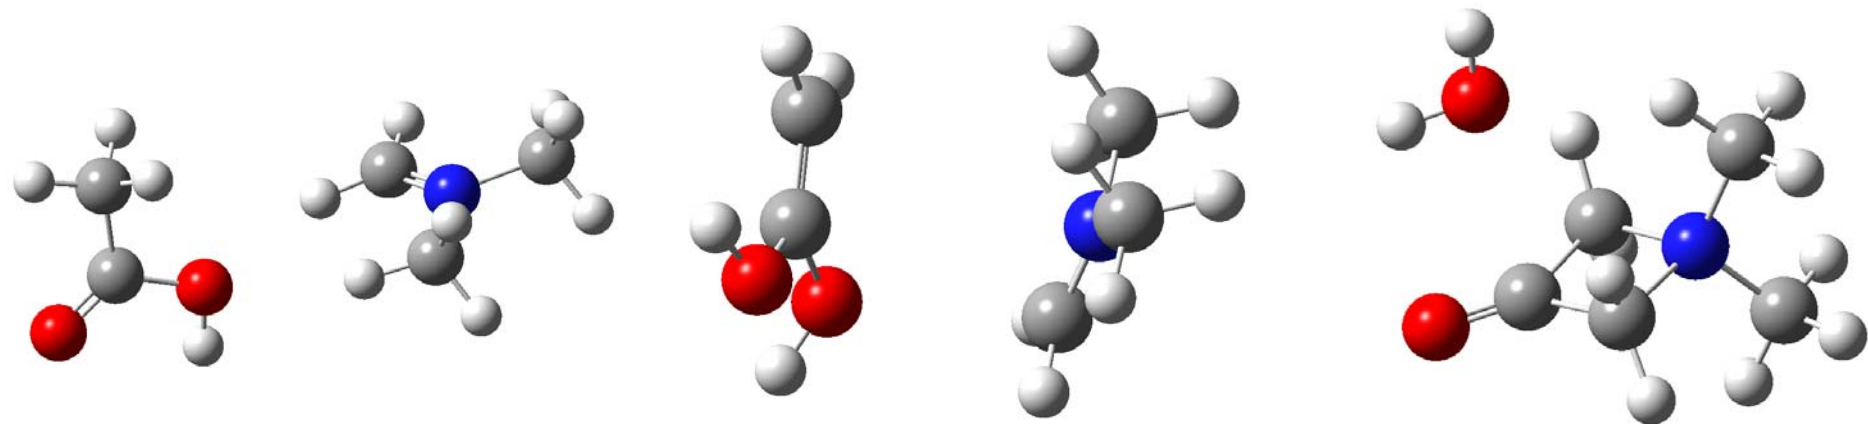

| IM <sub>c</sub> 1 |             |             |             | IM <sub>c</sub> 2 |             |             |             | IM <sub>c</sub> 3 |             |             |             |
|-------------------|-------------|-------------|-------------|-------------------|-------------|-------------|-------------|-------------------|-------------|-------------|-------------|
| N                 | 2.39416500  | 0.03826400  | -0.06606100 | C                 | -1.81688200 | 0.21504100  | -0.10469100 | C                 | -0.70045000 | -1.08891100 | 0.00002500  |
| C                 | 1.61640900  | 0.65476400  | -0.86497100 | C                 | -1.49945300 | 1.50653500  | -0.15066700 | C                 | 0.13813000  | -0.43123800 | 1.09771400  |
| H                 | -1.93424100 | 0.98612200  | 1.66428900  | O                 | -2.56132700 | -0.42385200 | 0.82897000  | O                 | -2.34387000 | 1.40006200  | -0.00008100 |
| H                 | 2.03433600  | 1.36146200  | -1.57260100 | O                 | -1.35433600 | -0.68067400 | -1.02344600 | O                 | -1.63685700 | -1.81335800 | 0.00002600  |
| H                 | 0.54669100  | 0.46121100  | -0.82936200 | N                 | 1.74746400  | -0.22678200 | 0.03301000  | N                 | 1.03595200  | 0.17652100  | 0.00000100  |
| C                 | 1.88249200  | -0.93644800 | 0.91868500  | H                 | -0.99577300 | 1.90580200  | -1.01765100 | H                 | -0.39112800 | 0.34163600  | 1.65215900  |
| H                 | 2.16489500  | -0.59929700 | 1.91593400  | H                 | -1.82215000 | 2.18618300  | -0.62442300 | H                 | 0.68815800  | -1.09436100 | 1.76341400  |
| H                 | 0.80173800  | -1.00880800 | 0.83015400  | H                 | -1.99140700 | -1.40869500 | -1.08686300 | C                 | 0.13779100  | -0.43082100 | -1.09766500 |
| H                 | 2.34920100  | -1.90173100 | 0.72253700  | C                 | 1.26253800  | -1.19244700 | -0.64092100 | C                 | 2.42186500  | -0.38668000 | -0.00032100 |
| C                 | 3.85451000  | 0.24683000  | -0.06345600 | C                 | 1.77349200  | -0.23376800 | 1.50710300  | C                 | 1.06452800  | 1.67311200  | 0.00030000  |
| H                 | 4.12517900  | 0.97652400  | -0.82155400 | C                 | 2.30913200  | 0.97535900  | -0.60967300 | H                 | -3.08766800 | 0.78348000  | 0.00023700  |
| H                 | 4.15288400  | 0.59870700  | 0.92397900  | H                 | -3.08707400 | 0.20843200  | 1.33616700  | H                 | 0.68761800  | -1.09371500 | -1.76376000 |
| H                 | 4.34104500  | -0.70716800 | -0.26606400 | H                 | 0.87444200  | -2.06297900 | -0.13016200 | H                 | -0.39165800 | 0.34224300  | -1.65166000 |
| C                 | -2.66820000 | -0.05798800 | -0.05413500 | H                 | 1.25874300  | -1.14967600 | -1.72151300 | H                 | 2.94089300  | -0.04007000 | -0.89211400 |
| O                 | -3.64619100 | -0.66133800 | -0.37612300 | H                 | 2.80629600  | -0.12627000 | 1.83809600  | H                 | 2.36849100  | -1.47371400 | -0.00051400 |
| O                 | -1.41315300 | -0.46479600 | -0.49577200 | H                 | 1.35421500  | -1.16465500 | 1.87844900  | H                 | 2.94117600  | -0.04040100 | 0.89143500  |
| H                 | -1.58965300 | -1.23976200 | -1.05612900 | H                 | 1.18535500  | 0.61085200  | 1.86346600  | H                 | 1.58981000  | 2.01114700  | -0.89129100 |
| C                 | -2.59806800 | 1.16075100  | 0.81532100  | H                 | 3.35766500  | 1.06280300  | -0.32476000 | H                 | 1.59005600  | 2.01078400  | 0.89188300  |
| H                 | -3.59495100 | 1.40192700  | 1.17357800  | H                 | 1.76083800  | 1.84575100  | -0.25272500 | H                 | 0.04046400  | 2.03670600  | 0.00051300  |
| H                 | -2.20438400 | 2.00458400  | 0.24415500  | H                 | 2.21894500  | 0.89181400  | -1.68909100 | H                 | -2.75323700 | 2.27421500  | -0.00018600 |

Filename: Bet\_TS-4ring\_A7\_1\_high\_OPT\_REV  
 Sum of electronic and  
 zero-point energies -402.67904 Hartrees

Filename: Bet\_TS-59\_form\_6C\_high\_OPT\_FWD  
 Sum of electronic and  
 zero-point energies = -402.64303 Hartrees

Filename: Bet\_TS-6ringB\_high\_OPT\_FWD  
 Sum of electronic and  
 zero-point energies = -402.64066 Hartrees

**Figure S8:** B3LYP/6-311++G(2d,p) calculated Cartesian coordinates and energies (Hartrees) for ion-molecule complexes IM<sub>c</sub> relevant to the [M+H]<sup>+</sup>.

Supplementary Material (ESI) for *PCCP*

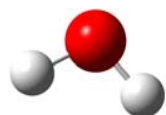

H<sub>2</sub>O

|   |             |             |            |
|---|-------------|-------------|------------|
| O | 0.00000000  | 0.11696400  | 0.00000000 |
| H | 0.76518100  | -0.46784500 | 0.00000000 |
| H | -0.76518100 | -0.46787100 | 0.00000000 |

Filename: Bet\_TS-6ringB\_high\_f18  
Sum of electronic and  
zero-point energies = -76.43852 Hartrees

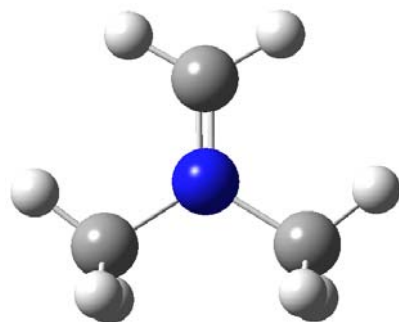

(CH<sub>3</sub>)<sub>2</sub>CH<sub>2</sub>N<sup>+</sup>

|   |             |             |             |
|---|-------------|-------------|-------------|
| N | 0.00000000  | 0.12348300  | -0.00000100 |
| C | -0.00000300 | 1.39627700  | 0.00000000  |
| C | 1.25009900  | -0.66272300 | 0.00000000  |
| C | -1.25009700 | -0.66272700 | 0.00000000  |
| H | 0.93929200  | 1.93655400  | 0.00000000  |
| H | -0.93930000 | 1.93654900  | -0.00000100 |
| H | 1.26081000  | -1.29334200 | 0.88883400  |
| H | 2.10675500  | 0.00540900  | 0.00004100  |
| H | 1.26084900  | -1.29328300 | -0.88887600 |
| H | -1.26084300 | -1.29328500 | 0.88887700  |
| H | -1.26080600 | -1.29334800 | -0.88883300 |
| H | -2.10675500 | 0.00540200  | -0.00004100 |

Filename: Bet\_TS-59\_form\_6C\_high\_f58  
Sum of electronic and  
zero-point energies = -173.56446 Hartrees

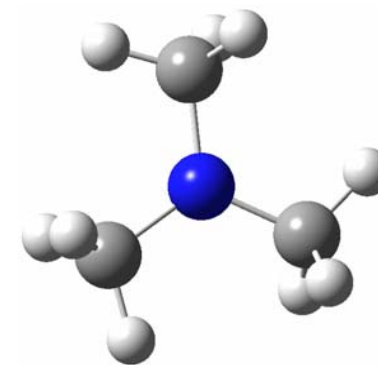

(CH<sub>3</sub>)<sub>3</sub>N<sup>+</sup>

|   |             |             |             |
|---|-------------|-------------|-------------|
| N | -0.00018762 | -0.00024624 | -0.00234866 |
| C | 1.27757451  | -0.67836878 | -0.00023574 |
| C | -1.22665443 | -0.76611886 | -0.00001961 |
| C | -0.05091794 | 1.44413182  | 0.00077597  |
| H | 2.09113000  | 0.04144415  | -0.02476903 |
| H | 1.32986630  | -1.34629788 | -0.86705780 |
| H | 1.34770736  | -1.30092826 | 0.89948852  |
| H | -1.80603401 | -0.50703729 | 0.89399896  |
| H | -1.01220695 | -1.83105712 | -0.01572624 |
| H | -1.82579507 | -0.48290729 | -0.87281899 |
| H | 0.49993634  | 1.82022870  | 0.87039251  |
| H | -1.08062227 | 1.78961181  | 0.02443841  |
| H | 0.45731878  | 1.82080185  | -0.89462945 |

Filename: Bet\_TS-59\_form\_high\_f59+  
Sum of electronic and  
zero-point energies = -174.13201 Hartrees

**Figure S9:** B3LYP/6-311++G(2d,p) calculated Cartesian coordinates and energies (Hartrees) for products relevant to the dissociation of [M+H]<sup>+</sup>.



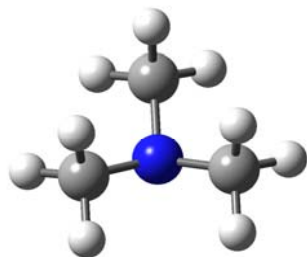

(CH<sub>3</sub>)<sub>3</sub>N

|   |   |          |          |          |
|---|---|----------|----------|----------|
| N | 0 | -0.04465 | -0.07143 | 0.02708  |
| C | 0 | -0.00795 | -0.0214  | 1.48269  |
| H | 0 | 1.03025  | 0.0341   | 1.82547  |
| H | 0 | -0.53108 | 0.87278  | 1.83629  |
| H | 0 | -0.47975 | -0.90627 | 1.95648  |
| C | 0 | 0.70254  | -1.21102 | -0.48835 |
| H | 0 | 1.74152  | -1.15769 | -0.14766 |
| H | 0 | 0.28311  | -2.18454 | -0.16217 |
| H | 0 | 0.70187  | -1.19036 | -1.58282 |
| C | 0 | -1.41187 | -0.05457 | -0.47614 |
| H | 0 | -1.40375 | -0.03162 | -1.57056 |
| H | 0 | -2.00078 | -0.93765 | -0.15468 |
| H | 0 | -1.92622 | 0.84426  | -0.12132 |

Filename: nme3\_sp  
 Sum of electronic and  
 zero-point energies -174.4111025 Hartrees

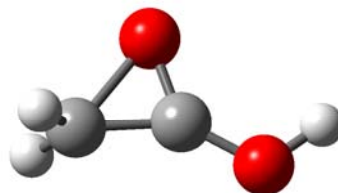

CH<sub>2</sub>COOH<sup>+</sup>

|   |   |          |          |          |
|---|---|----------|----------|----------|
| C | 0 | 0.16839  | 0.22598  | -0.06949 |
| H | 0 | -0.07916 | -0.76079 | 0.31561  |
| H | 0 | 1.18893  | 0.45876  | -0.36547 |
| C | 0 | -0.8191  | 1.25403  | -0.06874 |
| O | 0 | -0.90572 | 0.71184  | -1.20068 |
| O | 0 | -1.3824  | 2.1913   | 0.56221  |
| H | 0 | -2.09406 | 2.65496  | 0.06487  |

Filename: ch2cooh\_cation\_sp  
 Sum of electronic and  
 zero-point energies -228.121929 Hartrees

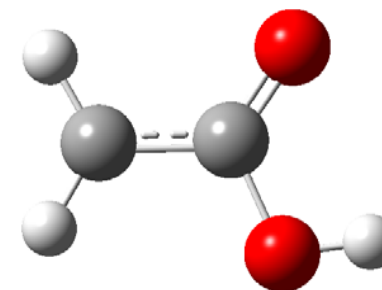

CH<sub>2</sub>COOH

|   |             |             |             |
|---|-------------|-------------|-------------|
| H | -2.12505000 | 0.48203100  | 0.00094500  |
| C | 0.01168500  | 0.10942800  | -0.00032200 |
| O | 0.39998300  | 1.26263200  | -0.00003500 |
| O | 0.87156400  | -0.94755300 | 0.00013100  |
| H | 1.76710600  | -0.57656000 | 0.00038200  |
| C | -1.37230500 | -0.29125200 | 0.00017600  |
| H | -1.65071600 | -1.33515800 | -0.00121800 |

Filename: Bet\_TS-59\_form\_high\_f59\_2  
 Sum of electronic and  
 zero-point energies = -228.45665 Hartrees

**Figure S10:** B3LYP/6-311++G(2d,p) calculated Cartesian coordinates and energies (Hartrees) for products relevant to the dissociation of [M+H]<sup>+</sup>.

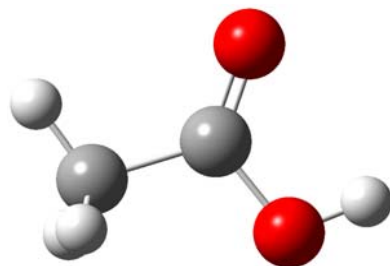

CH<sub>3</sub>COOH

|   |             |             |             |
|---|-------------|-------------|-------------|
| H | 1.66721400  | -0.71133100 | 0.88059500  |
| C | -0.08855600 | 0.12694900  | -0.00004500 |
| O | -0.62188000 | 1.20623900  | 0.00000700  |
| O | -0.79632000 | -1.03159800 | -0.00001000 |
| H | -1.73488800 | -0.78599700 | 0.00012100  |
| C | 1.39219600  | -0.12776900 | -0.00001800 |
| H | 1.92449900  | 0.81946000  | -0.00161500 |
| H | 1.66693600  | -0.71434300 | -0.87869200 |

Filename: Bet\_TS-4ring\_A7\_1\_high\_f60  
Sum of electronic and  
zero-point energies -229.10932 Hartrees

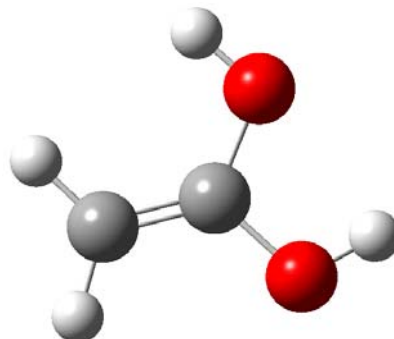

CH<sub>2</sub>C(OH)<sub>2</sub>

|   |             |             |             |
|---|-------------|-------------|-------------|
| C | 0.07745100  | -0.03551900 | -0.00000100 |
| C | 1.39493300  | -0.22388500 | -0.00012700 |
| O | -0.56905200 | 1.16663900  | 0.00004500  |
| O | -0.81581000 | -1.04723300 | 0.00004000  |
| H | 1.79589700  | -1.22494700 | 0.00017000  |
| H | 2.07472100  | 0.61527200  | 0.00040400  |
| H | -1.70467200 | -0.66996600 | -0.00023700 |
| H | 0.07864100  | 1.88081000  | -0.00024400 |

Filename: Bet\_TS-59\_form\_6C\_high\_f60  
Sum of electronic and  
zero-point energies = -229.06571 Hartrees

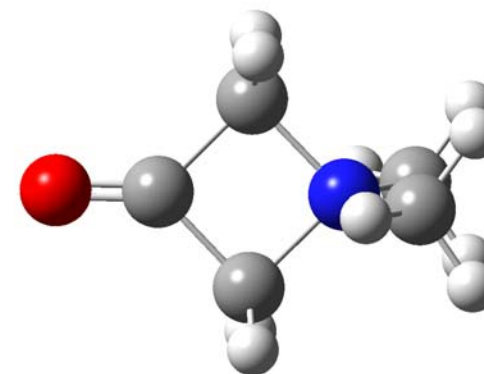

[(CH<sub>3</sub>)<sub>2</sub>N(CH<sub>2</sub>)<sub>2</sub>CO]<sup>+</sup>

|   |             |             |             |
|---|-------------|-------------|-------------|
| C | -1.42081000 | -0.00252000 | 0.00000000  |
| C | -0.35175900 | -0.00568500 | -1.09915400 |
| O | -2.60250500 | 0.00140200  | 0.00000000  |
| N | 0.73186600  | -0.00010400 | 0.00000000  |
| H | -0.30691300 | -0.90468400 | -1.71256800 |
| H | -0.30774400 | 0.88589600  | -1.72325600 |
| C | -0.35175900 | -0.00568500 | 1.09915400  |
| C | 1.57300700  | 1.23899600  | 0.00000000  |
| C | 1.58957300  | -1.22762400 | 0.00000000  |
| H | -0.30774500 | 0.88589600  | 1.72325600  |
| H | -0.30691300 | -0.90468500 | 1.71256700  |
| H | 2.19678700  | 1.23887500  | 0.89204600  |
| H | 0.92402600  | 2.11253400  | 0.00000000  |
| H | 2.19678700  | 1.23887500  | -0.89204500 |
| H | 2.21337800  | -1.21913900 | 0.89200000  |
| H | 2.21337800  | -1.21913800 | -0.89200000 |
| H | 0.95242000  | -2.10980900 | 0.00000000  |

Filename: Bet\_TS-6ringB\_high\_f100  
Sum of electronic and  
zero-point energies -326.18773 Hartrees

**Figure S11:** B3LYP/6-311++G(2d,p) calculated Cartesian coordinates and energies (Hartrees) for products relevant to the dissociation of [M+H]<sup>+</sup>.

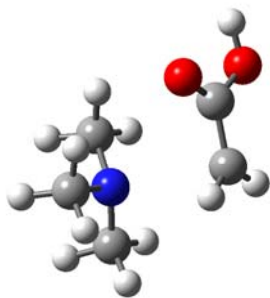

[(CH<sub>3</sub>)<sub>3</sub>NCH<sub>2</sub>COOH]

|   |   |          |          |          |
|---|---|----------|----------|----------|
| C | 0 | -1.04312 | -1.34837 | -0.73614 |
| H | 0 | -0.6461  | -1.2597  | -1.73686 |
| H | 0 | -0.85244 | -2.23438 | -0.14538 |
| C | 0 | -1.87943 | -0.29467 | -0.23778 |
| O | 0 | -2.39853 | -0.55844 | 1.0048   |
| O | 0 | -2.12748 | 0.76207  | -0.81617 |
| H | 0 | -2.95105 | 0.20589  | 1.23575  |
| N | 0 | 1.2994   | 0.04252  | 0.0071   |
| C | 0 | 1.05145  | 0.74344  | 1.26093  |
| H | 0 | 0.17265  | 1.38546  | 1.15487  |
| H | 0 | 0.85827  | 0.02071  | 2.0591   |
| H | 0 | 1.90722  | 1.37691  | 1.5635   |
| C | 0 | 1.43782  | 0.96275  | -1.11622 |
| H | 0 | 0.52354  | 1.55359  | -1.21998 |
| H | 0 | 2.29569  | 1.65028  | -0.99118 |
| H | 0 | 1.58717  | 0.3965   | -2.04068 |
| C | 0 | 2.41212  | -0.89218 | 0.1067   |
| H | 0 | 2.51184  | -1.45183 | -0.82843 |
| H | 0 | 3.37463  | -0.38401 | 0.30828  |
| H | 0 | 2.22684  | -1.60443 | 0.91662  |

Filename: betaine\_neutral\_sp

Sum of electronic and

zero-point energies -402.8686103 Hartrees

**Figure S12:** B3LYP/6-311++G(2d,p) calculated Cartesian coordinates and energies (Hartrees) for products relevant to the dissociation of [M+H].

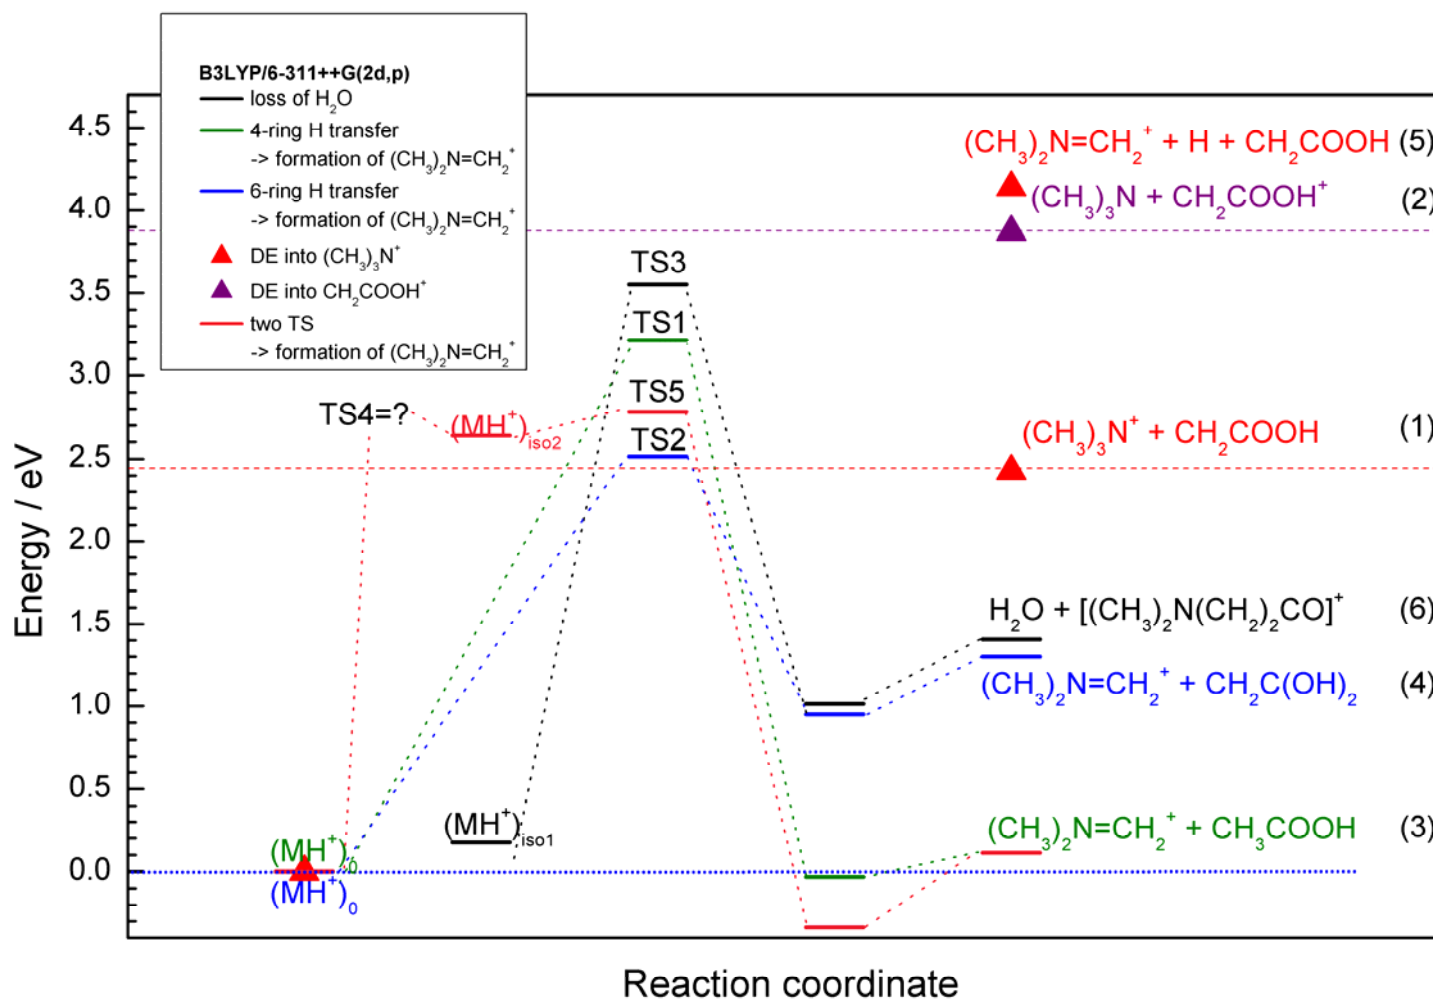

**Figure S13:** B3LYP/6-311++G(2d,p) DFT calculations on the competing reactions shown in eqns. 1-6. Relative energy diagram in eV. Note that the energy associated with the formation of products in eqn. 5 is calculated by adding the bond dissociation energy (see ref [35]) to the final energy of products shown in eqn. 3. Data includes alternative loss of acetic acid via TS5 (see reference 36).

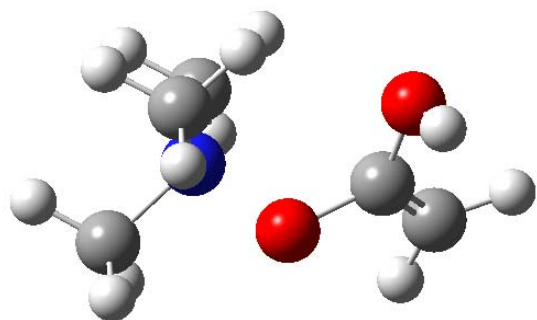

[M+H]<sup>+</sup> isomer2  
[(CH<sub>3</sub>)<sub>3</sub>N-O-C(OH)=CH<sub>2</sub>]<sup>+</sup>

|   |             |             |             |
|---|-------------|-------------|-------------|
| C | -1.45153100 | -0.06252900 | -0.20514600 |
| C | -2.28644100 | -1.06861900 | -0.00527600 |
| O | -0.21250400 | -0.32021000 | -0.79797300 |
| O | -1.68851600 | 1.23819700  | 0.10256800  |
| N | 0.98518600  | -0.03542900 | 0.03409100  |
| H | -1.98333200 | -2.08655200 | -0.20094100 |
| H | -3.29832900 | -0.87154500 | 0.31967000  |
| H | -1.93102500 | 1.75031900  | -0.68344600 |
| C | 1.37930700  | 1.39730200  | -0.16689200 |
| C | 2.00364900  | -0.95766100 | -0.56162400 |
| C | 0.74067200  | -0.35363700 | 1.47339100  |
| H | 0.61937100  | 2.03180500  | 0.27577200  |
| H | 1.46002700  | 1.57451000  | -1.23587900 |
| H | 2.34212800  | 1.54903600  | 0.31901800  |
| H | 2.95573900  | -0.77631000 | -0.06679700 |
| H | 2.07403200  | -0.74003800 | -1.62378400 |
| H | 1.67266200  | -1.98015900 | -0.40549400 |
| H | 1.68803300  | -0.22807300 | 1.99484500  |
| H | 0.39822900  | -1.38164100 | 1.55149400  |
| H | 0.00039000  | 0.33362600  | 1.87343000  |

Filename: Bet\_TS-4ring\_R4  
Sum of electronic and  
zero-point energies = -402.58096 Hartrees

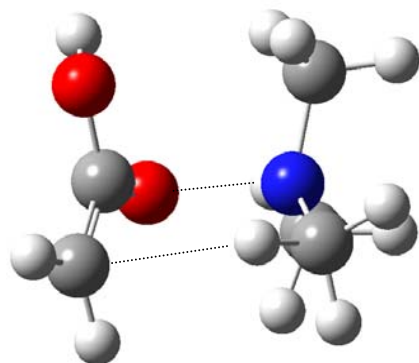

TS5

|   |             |             |             |
|---|-------------|-------------|-------------|
| C | -1.49343100 | -0.00683100 | -0.27480900 |
| C | -2.15235800 | -1.15353300 | 0.08817600  |
| O | -0.40343300 | -0.06753500 | -0.96047200 |
| O | -1.98046600 | 1.18759600  | 0.12399700  |
| N | 1.16537800  | -0.02875900 | 0.11269500  |
| H | -1.73045300 | -2.10911500 | -0.18443300 |
| H | -3.12324700 | -1.11256300 | 0.56391800  |
| H | -1.66325700 | 1.88789900  | -0.46459800 |
| C | 1.34744200  | 1.38832600  | 0.45578000  |
| C | 2.07101500  | -0.52756100 | -0.92723700 |
| C | 0.88750000  | -0.91326000 | 1.21785400  |
| H | 0.59012800  | 1.69323400  | 1.17391900  |
| H | 1.28455300  | 1.98680000  | -0.44971000 |
| H | 2.33999700  | 1.51131700  | 0.90126200  |
| H | 3.08550000  | -0.55727500 | -0.51776200 |
| H | 2.03815600  | 0.14341400  | -1.78191900 |
| H | 1.76337700  | -1.52635600 | -1.22460800 |
| H | 1.23451500  | -1.91981900 | 1.00121700  |
| H | -0.20770600 | -0.94885300 | 1.39338000  |
| H | 1.34096800  | -0.53070500 | 2.13368500  |

Filename: Bet\_TS-4ring\_R5  
Sum of electronic and  
zero-point energies = -402.57562 Hartrees

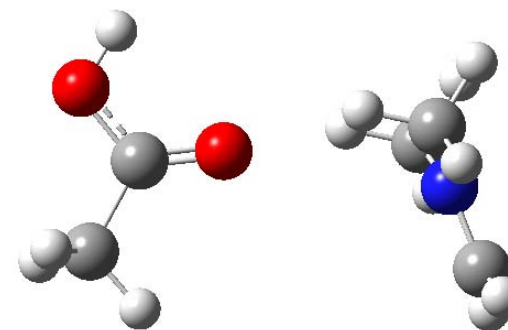

IM<sub>c</sub>

|   |             |             |             |
|---|-------------|-------------|-------------|
| C | -2.17439200 | 0.00300600  | -0.00007000 |
| C | -2.80690800 | 1.36064700  | -0.00075400 |
| O | -0.97667400 | -0.22046900 | 0.00008400  |
| O | -3.08371900 | -0.97776100 | 0.00035300  |
| N | 2.30095700  | 0.05292800  | -0.00004900 |
| H | -3.44766100 | 1.46688900  | 0.87670200  |
| H | -3.44716900 | 1.46619600  | -0.87865600 |
| H | -2.62537700 | -1.83325900 | 0.00076800  |
| C | 1.95437200  | -0.65610900 | -1.24634200 |
| C | 1.95417500  | -0.65245000 | 1.24826500  |
| C | 2.83874500  | 1.20496400  | -0.00169600 |
| H | 2.26184800  | -0.06326300 | -2.10341000 |
| H | 0.87551300  | -0.80895800 | -1.24515800 |
| H | 2.46800200  | -1.61726600 | -1.24726700 |
| H | 2.46795400  | -1.61351900 | 1.25217500  |
| H | 0.87533600  | -0.80546200 | 1.24728400  |
| H | 2.26134800  | -0.05700500 | 2.10363900  |
| H | 3.06641500  | 1.69557300  | 0.93678600  |
| H | -2.04228900 | 2.13224500  | -0.00086100 |
| H | 3.06657400  | 1.69281500  | -0.94157600 |

Filename: Bet\_TS-4ring\_R5\_IRC\_REV\_OPT  
Sum of electronic and  
zero-point energies = -402.69025 Hartrees

**Figure S14:** B3LYP/6-311++G(2d,p) calculated Cartesian coordinates and energies (Hartrees) for species relevant to the [M+H]<sup>+</sup>, transition states relevant to the [M+H]<sup>+</sup> and ion-molecule complex IM<sub>c</sub> relevant to the [M+H]<sup>+</sup>.
